# Supplementary material for: Do patients and health care providers have discordant preferences about which aspects of treatments matter most? Evidence from a systematic review of discrete choice experiments
Source: PubMed Central journal article supplement — BMJ Open. 2017 May 17;7(5):e014719. doi: 10.1136/bmjopen-2016-014719 (PMC5623426; doi:10.1136/bmjopen-2016-014719), 2017-05-17
Supplement: bmjopen-2016-014719supp001.pdf [file bmjopen-2016-014719supp001.pdf]

## **Appendix 1: Search Terms: MEDLINE July 28th**

### **Patients**

patient\*.mp OR Patients/ OR women.mp OR men.mp OR parent\*.mp OR caregiver.mp OR carer\*.mp

### **Prescribers**

prescriber\*.mp OR physician\*.mp OR provider\*.mp OR expert\*.mp OR doctor\*.mp OR specialist\*.mp  
OR professional\*.mp OR surgeon\*.mp

### **Preference**

preference\*.mp OR value\*.mp OR priorit\*.mp OR perspective\*.mp

### **Discrete-choice experiment**

part-worth utility\*.mp OR paired comparison\*.mp OR pairwise choice\*.mp OR stated preference.mp OR (discrete adj choice\$).mp. [mp = title, abstract, original title, name of substance word, subject heading word, keyword heading word, protocol supplementary concept word, rare disease supplementary concept word, unique identifier] OR (conjoint adj (analys\$ or measurement\$ or study or studies or choice\$)).mp. [mp = title, abstract, original title, name of substance word, subject heading word, keyword heading word, protocol supplementary concept word, rare disease supplementary concept word, unique identifier]

Final Search:

**(Patients AND Preference) AND (Prescribers AND Preference) AND (Discrete-choice experiment)**
