# Supplementary material for: Do patients and health care providers have discordant preferences about which aspects of treatments matter most? Evidence from a systematic review of discrete choice experiments
Source: PubMed Central journal article supplement — BMJ Open. 2017 May 17;7(5):e014719. doi: 10.1136/bmjopen-2016-014719 (PMC5623426; doi:10.1136/bmjopen-2016-014719), 2017-05-17
Supplement: bmjopen-2016-014719supp002.pdf [file bmjopen-2016-014719supp002.pdf]

**Appendix 2: Agreement statistics**

| Screening decision |                 | Agreement    |                 |                 |
|--------------------|-----------------|--------------|-----------------|-----------------|
|                    |                 | Overall<br>n | Reviewer 2<br>n | Reviewer 3<br>n |
| Reviewer 1         | Reviewer 2 or 3 | 922          | 450             | 473             |
| Y                  | Y               | 68           | 28              | 40              |
| Y                  | N               | 19           | 10              | 9               |
| N                  | N               | 820          | 399             | 421             |
| N                  | Y               | 15           | 12              | 3               |
| N agree            |                 | 888          | 427             | 461             |
| Agreement %        |                 | 96%          | 95%             | 97%             |
