# Supplementary material for: Do patients and health care providers have discordant preferences about which aspects of treatments matter most? Evidence from a systematic review of discrete choice experiments
Source: PubMed Central journal article supplement — BMJ Open. 2017 May 17;7(5):e014719. doi: 10.1136/bmjopen-2016-014719 (PMC5623426; doi:10.1136/bmjopen-2016-014719), 2017-05-17
Supplement: bmjopen-2016-014719supp003.pdf [file bmjopen-2016-014719supp003.pdf]

### Appendix 3: Summary of studies

| Lead Author           | Location           | Indication (disease)                                                                               | Intervention                                                                      | Samples compared                               | Attributes Tested                                                                                                                                          | Design of Attributes                                                                                                                                       | Generated in all groups? | Piloting of studies                             | Piloted in all groups? | Framing of choice tasks                                                                                                                                                                           | Choice same in all groups? |
|-----------------------|--------------------|----------------------------------------------------------------------------------------------------|-----------------------------------------------------------------------------------|------------------------------------------------|------------------------------------------------------------------------------------------------------------------------------------------------------------|------------------------------------------------------------------------------------------------------------------------------------------------------------|--------------------------|-------------------------------------------------|------------------------|---------------------------------------------------------------------------------------------------------------------------------------------------------------------------------------------------|----------------------------|
| Bishop et al. 2004    | United Kingdom     | Down's Syndrome                                                                                    | Screening                                                                         | 253 pregnant women/ 94 HCPs                    | Time at screening;<br>Detection rate;<br>Risk of miscarriage                                                                                               | Pilot study with 21 women                                                                                                                                  | No                       | Yes; methods not reported                       | Not known              | Women chose for themselves; HCPs chose for their patients (opt-out and indifference option provided)                                                                                              | No                         |
| Lee et al. 2005       | China              | Postoperative period (1 <sup>st</sup> DCE) and Postoperative nausea/ vomiting(2 <sup>nd</sup> DCE) | Preferred symptoms (1 <sup>st</sup> DCE) and drug treatment (2 <sup>nd</sup> DCE) | 200 women undergoing elective surgery/ 52 HCPs | DCE #1:<br>Risk of PONV;<br>Level of Pain;<br>Level of Sedation<br><br>DCE #2:<br>Type of regimen;<br>Efficacy of antiemetic;<br>Extra cost to patient     | Not reported                                                                                                                                               | Not known                | Not reported                                    | Not known              | DCE #1: Patients chose for themselves;<br>Framing not reported for HCPs.<br>DCE #2: Patients and HCPs randomized into low, moderate, high risk of PONV versions of DCE                            | No                         |
| Mantovani et al. 2005 | Italy              | Hemophilia                                                                                         | Drug treatment                                                                    | 178 patients/ 137 HCPs                         | Perceived viral safety;<br>Risk of inhibitor development;<br>Pharmaceutical dosage form; Distribution mode; Frequency of infusion for prophylaxis;<br>Cost | Generation with physicians, pharmacists and economists; piloting in patients, hematologists and pharmacists. Levels corresponded to available medications. | Yes                      | Yes: 5 patients, 5 physicians and 5 pharmacists | Yes                    | Respondents invited to choose one of the two pairs presented                                                                                                                                      | Not reported               |
| Espelid et al. 2006   | Norway and Denmark | Dental restoration                                                                                 | Materials used                                                                    | 306 patients/ 107 HCPs                         | Duration;<br>Appearance;<br><br>Adverse reaction;                                                                                                          | Generated by a general survey of patients and dentists in Great Britain, France, Germany, Italy and Sweden in 1998. Piloted in Norwegian dental students   | No                       | Not reported                                    | Not known              | Patients chose for themselves;<br>Dentists chose recommendation for an included patient case; dental assistants chose the best-suited option for the same patient case. Indifference option also. | No                         |
| Lewis et al. 2006     | Australia          | Down's Syndrome                                                                                    | Prenatal screening                                                                | 113 pregnant women/ 175 HCPs                   | Timing (weeks);<br>Accuracy (%);<br>Risk (%)                                                                                                               | Same method as described in Bishop et al. 2004                                                                                                             | No                       | See Bishop et al. 2004                          | See Bishop et al. 2004 | Patients chose for themselves; HCPs chose what they would offer women                                                                                                                             | No                         |

|                    |                |                       |                       |                                                              |                                                                                                   |                                                                                      |    |                                             |    |                                                                      |     |
|--------------------|----------------|-----------------------|-----------------------|--------------------------------------------------------------|---------------------------------------------------------------------------------------------------|--------------------------------------------------------------------------------------|----|---------------------------------------------|----|----------------------------------------------------------------------|-----|
| Gidman et al. 2007 | United Kingdom | Child daycase surgery | Provision of services | 280 parents of children undergoing daycase surgery/ 193 HCPs | Parental involvement in medical decisionmaking; Parental presence at the induction of anesthesia; | Generated from systematic literature search and analysis of interviews with parents. | No | Yes: in parents of children aged 3-11 years | No | Participants asked to choose the option they thought was preferable. | Yes |
|--------------------|----------------|-----------------------|-----------------------|--------------------------------------------------------------|---------------------------------------------------------------------------------------------------|--------------------------------------------------------------------------------------|----|---------------------------------------------|----|----------------------------------------------------------------------|-----|

|                           |                 |              |                             |                       |                                                                                                                       |                                                                                                                                    |     |                           |     |                                                                                                                                                           |    |
|---------------------------|-----------------|--------------|-----------------------------|-----------------------|-----------------------------------------------------------------------------------------------------------------------|------------------------------------------------------------------------------------------------------------------------------------|-----|---------------------------|-----|-----------------------------------------------------------------------------------------------------------------------------------------------------------|----|
|                           |                 |              |                             |                       | Staff attitude; Postoperative pain; Quality of recovery from anesthesia; Cost to parents                              |                                                                                                                                    |     |                           |     |                                                                                                                                                           |    |
| de BekkerGrob et al. 2009 | The Netherlands | Osteoporosis | Preventative drug treatment | 117 patients/ 39 HCPs | Effectiveness of treatment; Nausea as an adverse effect; Total treatment duration; Route of drug administration; Cost | Generated by literature review, expert interviews, and a study in communitydwelling women over 60yo with and without osteoporosis. | Yes | Yes: 2 GPs and 8 patients | Yes | Patients asked to choose for themselves; GPs asked to choose treatments for a standardized female patient over 60yo. 'No-drug' treatment option provided. | No |

|                      |                       |                   |           |                                                     |                                                                                                                                                                                                                                                                                                                                                                                                                                                                                                                                               |                                                                                                         |                                |                                                              |                              |                                                                                                                                                                     |    |
|----------------------|-----------------------|-------------------|-----------|-----------------------------------------------------|-----------------------------------------------------------------------------------------------------------------------------------------------------------------------------------------------------------------------------------------------------------------------------------------------------------------------------------------------------------------------------------------------------------------------------------------------------------------------------------------------------------------------------------------------|---------------------------------------------------------------------------------------------------------|--------------------------------|--------------------------------------------------------------|------------------------------|---------------------------------------------------------------------------------------------------------------------------------------------------------------------|----|
| Fiebig et al. 2009   | Australia             | Cervical Cancer   | Screening | 167 women who had Pap tests previously/<br>215 HCPs | <p><u>Women's Survey:</u><br/>Recommended screening interval;<br/>Familiarity of GP;<br/>Sex of GP*; Time since last cervical screening test; Doctor's recommendations*;<br/>Doctor's incentive;<br/>Cost of test*;<br/>Chance of false negative*; Chance of false positive*</p> <p><u>GP Survey:</u><br/>Reason for consultation*;<br/>Recommended screening interval;<br/>Familiarity with patient;<br/>Patient's last screening; Age*;<br/>Perception of patient's income/<br/>socioeconomic status*;<br/>Payment to practice for test</p> | Generated by literature review, current Australian policy context and a pilot test (Fiebig et al 2005). | Reported in Fiebig & Hall 2005 | Not reported                                                 | Not known                    | Women asked whether they would choose a cervical Pap and which test; GPs asked whether they would recommend a cervical Pap and which test. Opt-out option provided. | No |
| Marshall et al. 2009 | United States, Canada | Colorectal Cancer | Screening | 501 Canadians; 1087 Americans/<br>100 HCPs in       | Test process;<br>Test frequency;<br>Requirement for follow-up if initial test is positive;                                                                                                                                                                                                                                                                                                                                                                                                                                                    | Generated by a literature review, focus groups and the results of a Canadian-based                      | Not reported                   | Yes: patients and physicians attending clinics in California | Yes†<br>†Piloted in American | Participants asked to choose between two treatments, then between the same two or no                                                                                | No |

|  |  |  |  |                              |                                                                                                                                                        |                                                                                   |  |  |                  |                                                                                                  |  |
|--|--|--|--|------------------------------|--------------------------------------------------------------------------------------------------------------------------------------------------------|-----------------------------------------------------------------------------------|--|--|------------------|--------------------------------------------------------------------------------------------------|--|
|  |  |  |  | Canada and the United States | Pain/discomfort from the test;<br>Preparation needed for the test;<br>Risk of complications;<br>Test sensitivity;<br>Test specificity;<br>Cost of test | DCE completed in 2007. Further refined through clinical and methodological input. |  |  | respondents only | treatment. Physicians asked the same, but for a patient aged 50, no history of colorectal cancer |  |
|--|--|--|--|------------------------------|--------------------------------------------------------------------------------------------------------------------------------------------------------|-----------------------------------------------------------------------------------|--|--|------------------|--------------------------------------------------------------------------------------------------|--|

|                      |        |                                            |                                                                          |                                                                     |                                                                                                                                                                                                                                                            |                                                                                                                                                                                                             |              |              |           |                                                                                                                                                              |     |
|----------------------|--------|--------------------------------------------|--------------------------------------------------------------------------|---------------------------------------------------------------------|------------------------------------------------------------------------------------------------------------------------------------------------------------------------------------------------------------------------------------------------------------|-------------------------------------------------------------------------------------------------------------------------------------------------------------------------------------------------------------|--------------|--------------|-----------|--------------------------------------------------------------------------------------------------------------------------------------------------------------|-----|
| Neuman & Neuman 2009 | Israel | Labour and Hospitalization following birth | Provision of services                                                    | 323 women who recently gave birth/ 30 HCPs                          | Number of beds in hospital room; Attitude of staff towards patient; Professionalism of medical staff; Information given from personnel to patient<br>Travel time from residence to hospital                                                                | Generated by literature survey, in-depth interviews with women who recently gave birth, and a pilot study                                                                                                   | Not reported | Not reported | Not known | Women asked which maternity ward they would prefer; hospital staff asked to make choices that reproduce and represent the choices made by hospitalized women | Yes |
| Scalone et al. 2009  | Italy  | Hemophilia with inhibitors                 | Drug treatment                                                           | 37 patients with hemophilia with inhibitors and caregivers/ 64 HCPs | Risk of Infection; Risk of Anamnestic Response; Number of Infusions to stop bleeding; Time to stop bleeding; Time to pain recovery; Number of infusions/week for prophylaxis; Possibility of undergoing major surgery; Increase in healthcare taxes (cost) | Generated by 1 focus group with physicians, pharmacists and health economists; pilot study in 35 patients, pediatric caregivers, physicians and pharmacists; focus groups in physicians to determine levels | Yes          | Not reported | Not known | Patients and HCPs asked to choose the option with the maximum global benefit from their point of view                                                        | Yes |
| Davison et al. 2010  | Canada | Chronic Kidney Disease (CKD)               | Organ procurement, allocation, end-of-life care and organisation of care | 169 patients with Chronic Kidney Disease / 150 HCPs                 | Who provides comprehensive, day-to-day care; How deceased donor kidneys should be allocated; How live donor kidneys should be obtained; When should end-of-life care discussions begin; How much information should be provided on prognosis               | Generated by review of the literature on aspects of CKD management that are substantial ethical challenges to the nephrology community                                                                      | No           | Not reported | Not known | Participants asked to choose between hypothetical Chronic Kidney Disease programs                                                                            | Yes |

|  |  |  |  |  |                                                                            |  |  |  |  |  |  |
|--|--|--|--|--|----------------------------------------------------------------------------|--|--|--|--|--|--|
|  |  |  |  |  | and end-of-life care issues; How should decisions to stop dialysis be made |  |  |  |  |  |  |
|--|--|--|--|--|----------------------------------------------------------------------------|--|--|--|--|--|--|

|                       |                          |                                           |                            |                                              |                                                                                                                                                                                                                                                                                              |                                                                                                                                                                                                                                                                                         |     |                                                                          |           |                                                                                                                         |                                                          |
|-----------------------|--------------------------|-------------------------------------------|----------------------------|----------------------------------------------|----------------------------------------------------------------------------------------------------------------------------------------------------------------------------------------------------------------------------------------------------------------------------------------------|-----------------------------------------------------------------------------------------------------------------------------------------------------------------------------------------------------------------------------------------------------------------------------------------|-----|--------------------------------------------------------------------------|-----------|-------------------------------------------------------------------------------------------------------------------------|----------------------------------------------------------|
| Johnson et al. 2010   | United States            | Crohn's disease                           | Drug treatment             | 580 patients/<br>315 HCPs                    | Severity of symptoms;<br>Effect on serious complications; Time between flareups; Treatment requires taking oral steroids; Chance of dying from a serious infection within 10 years; Chance of dying or severe disability from PML within 10 years; Chance of dying from lymphoma in 10 years | Generated by review of the literature, consultations with 10 gastroenterologists to finalize hypothetical patient profiles, and interviews with 10 Crohn's disease patients.                                                                                                            | Yes | Yes: 51 Crohn's disease patients recruited by a market research company. | No        | Participants asked which treatment they would choose; Gastroenterologists evaluated for 3 hypothetical patients         | No                                                       |
| Bijlenga et al. 2011  | The Netherlands          | Pregnancy and delivery with complications | Valuation of health states | 24 patients+27 laypersons/ 30 HCPs           | Maternal health ante partum; Time between diagnosis and delivery; Process of delivery; Maternal outcome; Neonatal outcome                                                                                                                                                                    | In-depth interviews with 10 patients with gestational diabetes, preeclampsia, and/or intrauterine growth retardation as well as 10 obstetrical care professionals. Attribute levels assigned from these interviews, a literature search and results from the HYPITAT and DIGITAT trials | Yes | Not reported                                                             | Not known | Participants asked to choose between pairs of health states                                                             | Yes                                                      |
| van Empel et al. 2011 | The Netherlands, Belgium | Infertility                               | Treatment provision        | 925 patients/<br>227 HCPs                    | Travel time to clinic; Physician's attitude to patients; Information on treatments; Continuity of physicians; Clinic's mean ongoing pregnancy rate                                                                                                                                           | Attributes and levels generated from a literature search, focus groups with 82 Belgian and Dutch fertility clinic patients, expert panel of 5 fertility experts.                                                                                                                        | Yes | Yes: 8 couples during 4 rounds of cognitive interviewing.                | No        | Patients asked which fertility clinic they would choose. HCPs asked which clinic they would recommend to their patients | No                                                       |
| Faggioli et al. 2011  | Italy                    | Abdominal aortic aneurysm                 | Drug treatment             | 160 patients +<br>102 relatives /<br>30 HCPs | Type of anesthesia; Time necessary to recover (defined as returning to normal activities);                                                                                                                                                                                                   | Attributes and levels generated by review of the literature plus discussion with experienced staff                                                                                                                                                                                      | Yes | Not reported                                                             | Not known | Participants asked which treatment would they choose – cost attribute was framed as out-of-pocket cost for              | No<br><br><sup>†</sup> Cost attribute framed differently |

|                           |                |                                  |                                                                                              |                                                |                                                                                                                                                                                                                           |                                                                                                                                                                             |                        |                                                                                               |                  |                                                                                                                  |                                                                   |
|---------------------------|----------------|----------------------------------|----------------------------------------------------------------------------------------------|------------------------------------------------|---------------------------------------------------------------------------------------------------------------------------------------------------------------------------------------------------------------------------|-----------------------------------------------------------------------------------------------------------------------------------------------------------------------------|------------------------|-----------------------------------------------------------------------------------------------|------------------|------------------------------------------------------------------------------------------------------------------|-------------------------------------------------------------------|
|                           |                |                                  |                                                                                              |                                                | Need to repeat intervention within 5 years;<br>Type of periodical exams and medical visits on follow-up;<br>Risk of severe complications including death;<br>Additional cost                                              | surgeons and health economists with experience in outcomes research. Piloted in 6 patients and 7 experienced staff vascular surgeons                                        |                        |                                                                                               |                  | patients and additional hospital cost for HCPs                                                                   |                                                                   |
| Muhlbacher & Nubling 2011 | Germany        | Multiple Myeloma                 | Drug treatment                                                                               | 282 patients/ 213 HCPs                         | Life expectancy/ effectiveness;<br>Adverse effects;<br>Therapy-free intervals;<br>Physical quality of life;<br>Emotional quality of life;<br>Social quality of life;<br>Therapy application;<br>Further treatment options | Reported in Muhlbacher et al. 2008                                                                                                                                          | No                     | Yes <sup>†</sup>                                                                              | Yes <sup>†</sup> | Physicians asked to select their patients' preferences; patients' preferences elicited in Muhlbacher et al. 2008 | Yes                                                               |
| Payne et al. 2011         | United Kingdom | Azathioprine-induced neutropenia | Pharmacogenetic testing services for predicting the risk of azathioprine-induced neutropenia | 159 patients prescribed azathioprine/ 138 HCPs | Level of information given;<br>Predictive ability of test;<br>How the sample is collected;<br>Turnaround time for a result;<br>Who explains the test result                                                               | Generated by review of the literature; qualitative study described in Fargher et al. using focus groups with HCPs and interviews with patients; expert review of attributes | Yes                    | Yes: 20 clinic patients and 30 staff                                                          | Yes              | Participants asked to indicate which test they would choose.                                                     | Yes <sup>†</sup><br><br><sup>†</sup> From picture of DCE included |
| Shafey et al. 2011        | Canada         | Relapsed follicular lymphoma     | Drug treatment                                                                               | 81 patients/ 48 HCPs                           | Administration of treatment;<br>Toxicity;<br>Remission length;<br>Healthcare cost                                                                                                                                         | Attribute levels were determined by literature review, existing administration protocols and toxicities of each regimen                                                     | No                     | Yes: 2 members of the Calgary Hematology Group, 5 lymphoma patients and 5 medical oncologists | Yes              | DCE asked which treatment would participants choose                                                              | Yes                                                               |
| Thrumurthy et al 2011     | United Kingdom | Esophagogastric cancer           | Surgical treatment                                                                           | 81 patients/ 90 HCPs                           | Mortality;<br>Morbidity;<br>Quality of Life;<br>Cure rate;<br>Hospital type;<br>Reputation of surgeon                                                                                                                     | Attributes elicited by review of the literature, expert opinion and pilot test                                                                                              | Not known <sup>†</sup> | Yes: patients                                                                                 | No               | Participants chose between two hypothetical surgeries                                                            | Yes <sup>†</sup><br><br><sup>†</sup> From picture of DCE included |

|                        |                                |              |                |                        |                                                |                                                                       |     |                                            |     |                                                                           |     |
|------------------------|--------------------------------|--------------|----------------|------------------------|------------------------------------------------|-----------------------------------------------------------------------|-----|--------------------------------------------|-----|---------------------------------------------------------------------------|-----|
| Chancellor et al. 2012 | France, Germany, Italy, Spain, | Chronic Pain | Drug treatment | 186 patients/ 310 HCPs | <u>Patient DCE:</u><br>Effectiveness for pain; | Attributes elicited by review of the literature; focus groups with 44 | Yes | Yes: piloted among research colleagues and | Yes | Participants asked to choose between two profiles; optout option provided | Yes |
|------------------------|--------------------------------|--------------|----------------|------------------------|------------------------------------------------|-----------------------------------------------------------------------|-----|--------------------------------------------|-----|---------------------------------------------------------------------------|-----|

|                   |                |                   |                            |                                                 |                                                                                                                                                                                                                                            |                                                                                                                                                                                                                                               |     |                                                                                                                                                   |     |                                                                                                                                                   |     |
|-------------------|----------------|-------------------|----------------------------|-------------------------------------------------|--------------------------------------------------------------------------------------------------------------------------------------------------------------------------------------------------------------------------------------------|-----------------------------------------------------------------------------------------------------------------------------------------------------------------------------------------------------------------------------------------------|-----|---------------------------------------------------------------------------------------------------------------------------------------------------|-----|---------------------------------------------------------------------------------------------------------------------------------------------------|-----|
|                   | United Kingdom |                   |                            |                                                 | Constipation and bowel problems;*<br>Nausea and vomiting;*<br>Alertness;*<br>Energy*<br><br><u>Physician DCE:</u><br>Range of dosage forms;*<br>Proportion of patients with 50% pain reduction; Side effects (constipation, NV, CNS)*      | osteoarthritis/low back pain patients and 40 cancer pain patients; semi structured telephone interviews with 9 physicians.                                                                                                                    |     | then soft launched before actual release                                                                                                          |     |                                                                                                                                                   |     |
| Clark et al. 2012 | United Kingdom | Kidney Transplant | Prioritization preferences | 908 patients + 41 carers + 48 donors / 113 HCPs | Time spent awaiting transplant;<br>Tissue type matching;<br>Number of child or adult dependents the recipient has;<br>Recipient age;<br>Diseases predominantly affecting life expectancy; Diseases predominantly affecting quality of life | Attributes and level selection mainly informed by discussion with clinicians; piloted in 60 respondents (41 patients, 16 healthcare practitioners, 1 donor, 1 carer, 1 renal consultant's secretary) and analysed using random effects probit | Yes | Yes: 60 respondents (41 patients, 16 healthcare practitioners, 1 donor, 1 carer, 1 renal consultant's secretary); confirmed attributes and survey | Yes | Participants asked to express a stated preference for which one of two transplant recipients should receive a kidney.                             | Yes |
| Hill et al. 2012  | United Kingdom | Down's Syndrome   | Prenatal screening         | 335 women/ 181 HCPs                             | Accuracy;<br>Time of results;<br>Risk of miscarriage;<br>Information gained from the test                                                                                                                                                  | Attributes selected by literature review                                                                                                                                                                                                      | No  | Yes: 17 midwives and 20 women                                                                                                                     | Yes | Patients asked which test they preferred to have; HCPs asked which test they preferred to offer patients. Option to choose neither test provided. | No  |

|                      |             |                                 |                       |                                            |                                                                                                                                                      |                                                                             |     |                                |           |                                                      |     |
|----------------------|-------------|---------------------------------|-----------------------|--------------------------------------------|------------------------------------------------------------------------------------------------------------------------------------------------------|-----------------------------------------------------------------------------|-----|--------------------------------|-----------|------------------------------------------------------|-----|
| Park et al. 2012     | South Korea | Metastatic renal cell carcinoma | Drug treatment        | 140 patients + 60 family members/ 295 HCPs | Progression-free survival; Bone marrow suppression (neutropenia/ thrombocytopenia); Hand-foot skin reaction; GI perforation Bleeding; Administration | Attributes selected by comprehensive literature review and expert opinions. | No  | Yes: 20 persons before launch. | Not known | Participants asked which treatment they would choose | No  |
| Pedersen et al. 2012 | Denmark     | Primary Care                    | Provision of services | 698 members of the general                 | Typical waiting time on telephone;                                                                                                                   | Attributes generated by                                                     | Yes | Yes: cognitive interviews and  | Yes       | Respondents asked to choose their                    | Yes |

|                     |                 |                                                 |                                                             |                                                                    |                                                                                                                                                                                                                                                |                                                                                                                                                  |    |                                                |     |                                                                                                                                                                                         |     |
|---------------------|-----------------|-------------------------------------------------|-------------------------------------------------------------|--------------------------------------------------------------------|------------------------------------------------------------------------------------------------------------------------------------------------------------------------------------------------------------------------------------------------|--------------------------------------------------------------------------------------------------------------------------------------------------|----|------------------------------------------------|-----|-----------------------------------------------------------------------------------------------------------------------------------------------------------------------------------------|-----|
|                     |                 |                                                 |                                                             | public/ 969 HCPs                                                   | Opening hours; Typical waiting time to appointment; Distance to practice; Typical wait time in waiting room; Average consultation time; Who performs routine tasks                                                                             | literature review, interviews with GPs, interviews with patients, and discussions with the Organization of General Practitioners of Denmark      |    | pilot studies in general population and GPs    |     | preferred alternative from a set; one set of forced choices and one set of unforced choices                                                                                             |     |
| Regier et al. 2012  | Canada          | Antimicrobial prophylaxis in pediatric oncology | Provision or nonprovision of drug treatment for prophylaxis | 102 parents of pediatric oncology patients/ 60 HCPs                | Risk of infection; Risk of death; Risk of nausea, vomiting, diarrhea or headache; Route of administration; Cost (out of pocket)<br><br>Two DCE versions: one for antifungal prophylaxis and one for antibacterial                              | Attributes and levels informed by literature review, qualitative interviews with 3 experienced pediatric oncology physicians                     | No | Yes: parents and health care professionals     | Yes | Parents asked to imagine that their child were a candidate for antimicrobial prophylaxis; HCPs asked to imagine their patients were candidates for prophylaxis. Optout option provided. | Yes |
| de Bekker-Grob 2013 | The Netherlands | Early prostate cancer                           | Drug treatment                                              | 110 patients with + PSA results but no biopsy results yet/ 50 HCPs | Risk of urinary incontinence due to treatment; Risk of erection problems due to treatment; Risk of other permanent side effects due to treatment; Main aim is to cure; Frequency of PSA testing with a risk of new biopsies; Type of treatment | Attributes and levels informed by literature review, interviews with urologists and senior researchers in the field of prostate cancer research. | No | Yes: 11 patients and urologists before launch. | Yes | Participants asked to consider both treatment alternatives as realistic and forced to choose from among them                                                                            | Yes |



|                   |                |                                         |                              |                                       |                                                                                                               |                                                                                                                 |           |                    |           |                                                                                                                                             |     |
|-------------------|----------------|-----------------------------------------|------------------------------|---------------------------------------|---------------------------------------------------------------------------------------------------------------|-----------------------------------------------------------------------------------------------------------------|-----------|--------------------|-----------|---------------------------------------------------------------------------------------------------------------------------------------------|-----|
| Boone et al. 2013 | United Kingdom | Colorectal cancer                       | Screening by CT Colonography | 75 patients/ 50 HCPs                  | Number of additional true positive detections;<br>Number of additional false positive detections              | Not reported                                                                                                    | Not known | Yes: 10 volunteers | No        | Participants asked to choose between a hypothetical "enhanced" test or the standard test                                                    | Yes |
| Laver et al. 2013 | Australia      | Rehabilitation/<br>Occupational therapy | Provision of services        | 100 rehabilitation patients/ 114 HCPs | Mode of therapy;<br>Dose of therapy (per day);<br>Team providing therapy;<br>Amount of recovery made;<br>Cost | Attributes and levels informed by literature search and qualitative interviews with 10 rehabilitation patients. | No        | Not reported       | Not known | Patients asked to identify their preferred rehabilitation program; HCPs asked to choose what they would recommend for one of their 'typical | No  |

|                        |         |          |                |                                                      |                                                                                                                                                            |                                                                                 |    |                                  |    |                                                                                                                                            |     |
|------------------------|---------|----------|----------------|------------------------------------------------------|------------------------------------------------------------------------------------------------------------------------------------------------------------|---------------------------------------------------------------------------------|----|----------------------------------|----|--------------------------------------------------------------------------------------------------------------------------------------------|-----|
|                        |         |          |                |                                                      |                                                                                                                                                            |                                                                                 |    |                                  |    | rehabilitation clients'.                                                                                                                   |     |
| Muhlbacher et al. 2013 | Germany | HIV/AIDs | Drug treatment | 218 patients (from Muhlbacher et al. 2013)/ 131 HCPs | Life expectancy;<br>Long-term side effects;<br>Flexibility of dosing;<br>Physical quality of life;<br>Emotional quality of life;<br>Social quality of life | Attributes and levels informed by literature search and 4 patient focus groups; | No | Yes: 28 patients prior to launch | No | Patients asked to choose between two treatments; HCPs asked to choose how they thought their patients would rate or what they would choose | Yes |

|                            |                 |                        |                       |                                                        |                                                                                                                                                                                                                                                                                                                                                                                                                                                                                                                                                                 |                                                                                                                                                                      |     |                                                |           |                                                                                                                                                           |     |
|----------------------------|-----------------|------------------------|-----------------------|--------------------------------------------------------|-----------------------------------------------------------------------------------------------------------------------------------------------------------------------------------------------------------------------------------------------------------------------------------------------------------------------------------------------------------------------------------------------------------------------------------------------------------------------------------------------------------------------------------------------------------------|----------------------------------------------------------------------------------------------------------------------------------------------------------------------|-----|------------------------------------------------|-----------|-----------------------------------------------------------------------------------------------------------------------------------------------------------|-----|
| Deal et al. 2014           | Canada          | Cardiovascular disease | Electronic management | 74 patients/ 70 HCPs                                   | <p><u>Patient DCE:</u><br/> Fee/month; Speed of new info added to vascular tracker;<br/> Individual patient tracker values displayed;<br/> Nurse coordinator tasks /duties; Access to nurse coordinator;*<br/> Vascular visits to physician/year</p> <p><u>Physician DCE:</u><br/> Fee/month; Speed of revised information in the vascular tracker;<br/> Tracker values displayed;<br/> Nurse coordinator tasks;<br/> Nurse coordinator payment/month;*<br/> Efficiency in seeing patients;*<br/> Billing incentives from government (pay for performance)*</p> | Attributes and levels informed by focus groups conducted with 29 physicians and 21 patients                                                                          | Yes | Not reported                                   | Not known | Participants considered 18 choice screens including 2 fixed tasks and selected their most preferred out of 3 randomly selected C3CVT program alternatives | Yes |
| Hill et al. 2014           | United Kingdom  | Cystic fibrosis        | Prenatal screening    | 92 adult patients with CF + 50 carriers of CF/ 70 HCPs | Accuracy;<br>Time of results;<br>Miscarriage risk                                                                                                                                                                                                                                                                                                                                                                                                                                                                                                               | Attributes and levels informed by a series of focus groups with carriers of single gene disorders.                                                                   | No  | Yes: 20 carriers of cystic fibrosis            | No        | Patients and carriers chose for themselves; HCPs chose the test they would prefer to offer. Opt-out (neither test) option provided.                       | No  |
| Huppel-schoten et al. 2014 | The Netherlands | Infertility            | Treatment provision   | 550 patients/ 45 HCPs                                  | Clinic's mean ongoing pregnancy rate;<br>Information provision;<br>Patient involvement;<br>Continuity of physicians;<br>Additional costs per IVF cycle                                                                                                                                                                                                                                                                                                                                                                                                          | Attributes and levels informed by literature review and an interview with the chief of the healthcare purchasing department in a large Dutch health insurer company. | No  | Yes: 13 infertile couples and a health insurer | Yes       | Participants asked which clinic they would choose                                                                                                         | Yes |

|                     |                      |                              |                           |                                                                       |                                                                                                                                                                                                           |                                                                                                                                                                                                                      |     |                                                                                        |           |                                                                                                                                                                                            |                                                                      |
|---------------------|----------------------|------------------------------|---------------------------|-----------------------------------------------------------------------|-----------------------------------------------------------------------------------------------------------------------------------------------------------------------------------------------------------|----------------------------------------------------------------------------------------------------------------------------------------------------------------------------------------------------------------------|-----|----------------------------------------------------------------------------------------|-----------|--------------------------------------------------------------------------------------------------------------------------------------------------------------------------------------------|----------------------------------------------------------------------|
| Mol et al. 2014     | The Netherlands      | Diabetes                     | Drug treatment            | 226 patients with Type 2 diabetes/ 227 HCPs                           | Glycated hemoglobin; Cardiovascular disease risk; Effect on body weight; Mild nausea, vomiting or diarrhea; Hypoglycemia; Risk of cancer                                                                  | Attributes and levels informed by informal literature review, regulatory requirements and product labelling of oral antidiabetic drugs, and 22 indepth interviews with patients, nurses, regulators and pharmacists. | Yes | Not reported                                                                           | Not known | Standard patient case presented to all participants. Regulators: treatment they felt appropriate. HCPs: treatment they would recommend. Patients: imagine they were that patient to choose | Yes <sup>†</sup><br><br><sup>†</sup> Based on figure of DCE provided |
| Beulen et al. 2015  | The Netherlands      | Infant genetic abnormalities | Prenatal screening        | 507 pregnant women/ 283 HCPs                                          | Minimal gestational age; Time to wait for results; Level of information; Detection rate; False positive rate; Miscarriage risk; Cost                                                                      | Attributes and levels informed by systematic literature review, semi-structured interviews with pregnant women, and expert panel discussion.                                                                         | Yes | Yes: 54 participants <sup>†</sup><br><br><sup>†</sup> Type of participant not reported | Not known | Patients asked which test they would prefer to have; healthcare practitioners asked which test they would prefer for their patients. Optout (no test) option provided.                     | No                                                                   |
| Gatta et al 2015    | Turkey               | Bone metastases              | Drug treatment            | 91 patients/ 99 HCPs                                                  | Months to first skeletal-related event/ complication of bone metastases; Months until worsening of pain; Annual risk of Osteonecrosis of the Jaw; Annual risk of renal impairment; Administration regimen | Attributes and levels informed by review of prescribing information, literature review, and consultation with clinical experts                                                                                       | No  | Yes: opened interviews with 8 physicians and 15 patients in the United States          | Yes       | Patients asked to choose the treatment based on their key attributes and the level to which each option fulfilled them; HCPs given two patient cases for this choice                       | No                                                                   |
| Okumura et al. 2015 | Japan, United States | Atrial fibrillation          | Anticoagulation treatment | Japan: 152 patients/ 164 HCPs<br>United States: 185 patients/107 HCPs | Risk of minor stroke (non disabling); Risk of major stroke (disabling); Risk of blood clot in the leg (non-CNS, systemic embolism); Risk of heart attack;                                                 | Attributes and levels informed by review of clinical trials of anticoagulants, consultation with experts, and semi-structured interviews with 8                                                                      | Yes | Not reported                                                                           | Not known | Patients asked to choose between treatments as if choosing for themselves; Physicians asked to choose treatments                                                                           | No                                                                   |

|                    |           |                    |                                      |                                   |                                                                                                                                                                 |                                                                                                                                                              |     |                                                                                                             |     |                                                                                                                                                                                     |    |
|--------------------|-----------|--------------------|--------------------------------------|-----------------------------------|-----------------------------------------------------------------------------------------------------------------------------------------------------------------|--------------------------------------------------------------------------------------------------------------------------------------------------------------|-----|-------------------------------------------------------------------------------------------------------------|-----|-------------------------------------------------------------------------------------------------------------------------------------------------------------------------------------|----|
|                    |           |                    |                                      |                                   | Risk of moderate bleeding (clinically relevant, non-major); Risk of nonfatal major bleeding (extracranial major bleed); Risk of all-cause death                 | patients and 9 physicians in the United States                                                                                                               |     |                                                                                                             |     | for 4 virtual patients                                                                                                                                                              |    |
| Whitty et al. 2015 | Australia | Chronic conditions | Community pharmacy service provision | 602 patients or carers / 297 HCPs | Continued medicines supply; Management of ongoing condition; Pharmacy location; Method of getting medicines; Medicine reviews or advice; Average cost per month | Attributes and levels informed by qualitative methods: 97 consumer and carer interviews and 26 focus groups with consumers, carers and health professionals. | Yes | Yes: convenience sample of all target populations, then in 36 adults with chronic conditions before launch. | Yes | Patients and carers asked if they would choose the new service, or remain at their current pharmacy. HCPs asked to choose the pharmacy service they thought consumers would prefer. | No |
